## The COVID-19 pandemic storm in India.

Igor Nesteruk

Institute of Hydromechanics, National Academy of Sciences of Ukraine, Zheliabova 8/4, UA-03680  
Kyiv, Ukraine

National Technical University of Ukraine “Igor Sikorsky Kyiv Polytechnic Institute”,  
Prosp.Peremohy 37, UA-03056, Kyiv, Ukraine.  
[inesteruk@yahoo.com](mailto:inesteruk@yahoo.com)

### ABSTRACT

The sharp increase in the number of new COVID-19 patients in India in the second half of April 2021 has caused alarm around the world. A detailed analysis of this pandemic storm is still ahead. We present the results of anterior analysis using a generalized SIR-model (susceptible-infected-removed). The final size of this pandemic wave and its duration are predicted. Obtained results show that the COVID-19 pandemic will be a problem for mankind for a very long time.

**Keywords:** COVID-19 pandemic, epidemic dynamics in India, mathematical modeling of infection diseases, SIR model, parameter identification, statistical methods.

### Introduction

The daily number of new laboratory-confirmed COVID-19 cases in India exceeded 400,000 in the end of April 2021. This huge figure is frightening, but if we take into account the population of India, the number of new cases per capita is not yet higher than the maximum for some other countries, including Ukraine. It is very important to assess the growing trends in the number of new cases and the ability of the Indian medical system to cope with the huge number of patients and deaths.

Any mathematical modeling of the epidemic dynamics will be of particular value if we make an accurate long-term forecast of its duration and number of diseases using statistics data sets obtained immediately after the outbreak. Many authors are trying to predict the Covid-19 pandemic dynamics in many countries and regions [1-72]. We will not analyze these studies in details and only note that the correct mathematical simulation of the Covid-19 pandemic is very difficult for at least two reasons.

First, data on the number of cases are clearly incomplete immediately after the epidemic outbreak, there are quite long hidden periods [67, 70, 73-77]. In particular, first COVID-19 cases probably have appeared already in August 2019 [67, 70]. The reason is the large number of asymptomatic patients and the lack of skills to detect a new disease. It must be noted that large discrepancy between registered and actual number of cases occurred even for later periods of Covid-19 pandemic [72, 78-80].

The second reason for the limited accuracy of long-term forecasts is the constant changes in the conditions of the pandemic (quarantine measures, social behavior, virulence of the pathogen, etc.).

NOTE: This preprint reports new research that has not been certified by peer review and should not be used to guide clinical practice.

Therefore, a prediction made using statistics for a certain time period is not suitable for other periods of time. To solve this problem a generalized SIR-model and the methods of its parameter identification

was proposed in [70, 81, 82]. Since the new pandemic wave in India is not the first one we will use the generalized SIR-model and the method of direct parameter identification (without calculations of the previous epidemic waves) [83]. Corresponding results for the first Covid-19 epidemic waves in mainland China, USA, Germany, the UK, the Republic of Korea, Austria, Italy, Spain, France, the Republic of Moldova, Qatar, Ukraine, the city of Kyiv and for the world are already published in [65, 67, 69-72, 81, 82] and showed rather good accuracy. In this article we will apply the same approach to the case of India.

## Data

| Day in March 2021, $t_j$ | Number of cases, $V_j$ | Day in April 2021 | Number of cases, $V_j$ |
|--------------------------|------------------------|-------------------|------------------------|
| 1                        | 11124527               | 1                 | 12303131               |
| 2                        | 11139516               | 2                 | 12392260               |
| 3                        | 11156923               | 3                 | 12485509               |
| 4                        | 11173761               | 4                 | 12589067               |
| 5                        | 11192045               | 5                 | 12686049               |
| 6                        | 11210799               | 6                 | 12801785               |
| 7                        | 11229398               | 7                 | 12928574               |
| 8                        | 11244786               | 8                 | 13060542               |
| 9                        | 11262707               | 9                 | 13205926               |
| 10                       | 11285561               | 10                | 13358805               |
| 11                       | 11308846               | 11                | 13527717               |
| 12                       | 11333728               | 12                | 13689453               |
| 13                       | 11359048               | 13                | 13873825               |
| 14                       | 11385339               | 14                | 14074564               |
| 15                       | 11409831               | 15                | 14291917               |
| 16                       | 11438734               | 16                | 14526609               |
| 17                       | 11474605               | 17                | 14788003               |
| 18                       | 11514331               | 18                | 15061805               |
| 19                       | 11555284               | 19                | 15320972               |
| 20                       | 11599130               | 20                | 15616130               |
| 21                       | 11646081               | 21                | 15930774               |
| 22                       | 11686796               | 22                | 16263695               |
| 23                       | 11734058               | 23                | 16610481               |
| 24                       | 11787534               | 24                | 16960172               |
| 25                       | 11846652               | 25                | 17313163               |
| 26                       | 11908910               | 26                | 17636186               |
| 27                       | 11971624               | 27                | 17997113               |
| 28                       | 12039644               | 28                | 18376421               |
| 29                       | 12095855               | 29                | 18762976               |
| 30                       | 12149335               | 30                | 19164969               |
| 31                       | 12221665               | -                 | -                      |

**Table 1. Cumulative numbers of laboratory confirmed Covid-19 cases in India  $V_j$  according to JHU, [84].**

We will use the data set regarding the accumulated numbers of confirmed COVID-19 cases in India ( $V_j$ ) from Data Repository by the Center for Systems Science and Engineering (CSSE) at Johns Hopkins University (JHU) [84]. The values  $V_j$  and corresponding time moments  $t_j$  (measured in days) are shown in Table 1.

### Generalized SIR model and parameter identification procedure

The classical SIR model for an infectious disease [85-87] was generalized in [70, 72, 81] to simulate different epidemic waves. We suppose that the SIR model parameters are constant for every epidemic wave, i.e. for the time periods:  $t_i^* \leq t \leq t_{i+1}^*$ ,  $i=1,2,3,\dots$ . Then for every wave we can use the equations, similar to [85-87]:

$$\frac{dS}{dt} = -\alpha_i SI, \quad (1)$$

$$\frac{dI}{dt} = \alpha_i SI - \rho_i I, \quad (2)$$

$$\frac{dR}{dt} = \rho_i I. \quad (3)$$

Here  $S$  is the number of susceptible persons (who are sensitive to the pathogen and **not protected**);  $I$  is the number of infectious persons (who are sick and **spread the infection**); and  $R$  is the number of removed persons (who **no longer spread the infection**). It must be noted that  $I(t)$  is not the number of active cases. People can be ill (among active cases), but isolated. In means, that they don't spread the infection anymore. There are many people spreading the infection but not tested and registered as active cases. The use of number of active cases as  $I(t)$  in some papers a principal mistake which may lead to incorrect results. Parameters  $\alpha_i$  and  $\rho_i$  are supposed to be constant for every epidemic wave.

To determine the initial conditions for the set of equations (1)–(3), let us suppose that at the beginning of every epidemic wave  $t_i^*$ :

In [70, 72, 81] the set of differential equations (1)-(3) was solved with the use of initial conditions

$$I(t_i^*) = I_i, \quad R(t_i^*) = R_i, \quad S(t_i^*) = N_i - I_i - R_i$$

$$N_i = S + I + R$$

and by introducing the function  $V(t) = I(t) + R(t)$ , corresponding to the number of victims or the cumulative confirmed number of cases. For many epidemics (including the COVID-19 pandemic) we cannot observe dependencies  $S(t)$ ,  $I(t)$  and  $R(t)$  but observations of the accumulated number of cases

$V_j$  corresponding to the moments of time  $t_j$  provide information for direct assessments of the dependence  $V(t)$ . The corresponding analytical formulas for this exact solution; the saturation levels  $S_{i\infty}$ ;  $V_{i\infty} = N_i - S_{i\infty}$  (corresponding the infinite time moment) and the final day of the  $i$ -th epidemic wave (corresponding the moment of time when the number of persons spreading the infection will be less than 1) can be found in [70, 72, 81].

The exact solution depends on five parameters -  $N_i, I_i, R_i, \nu_i, \alpha_i$ . The values  $V_j$ , corresponding to the moments of time  $t_j$  can be used to find the optimal values of this parameters corresponding to the maximum value of the correlation coefficient  $r_i$  [88]. The details of this approach can be found in [89, 90]. It was successfully used in [65, 67, 69-72, 81-83, 89, 91, 92] to simulate the COVID-19 pandemic dynamics and other phenomena. The exact solution [70, 72, 81] allows avoiding numerical solutions of differential equations (1)-(3) and significantly reduces the time spent on calculations. The new algorithm proposed in [90] allows estimating the optimal values of SIR parameters for the  $i$ -th epidemic wave directly (without simulations of the previous waves) with the use of only two independent parameters  $N_i$  and  $\nu_i$ .

## Results

The optimal values of parameters and other characteristics of the severe COVID-19 pandemic wave in India are calculated and listed in Table 2. We have used the number  $i=2$  and the time period:  $T_{c2}$  - April 10-23, 2021 for SIR simulations of this wave. Corresponding values of  $V_j$  and  $t_j$  are listed in Table 1. The value of the correlation coefficient  $r_i = 0.999959712033103$  is very high (see Table 2), nevertheless we are not satisfied with the convergence procedure by isolation of the maximum of this parameter. Probably new simulation with the use of fresher datasets could fix this problem. The estimate of the average duration of the infection spread in India  $\tau_i = 1/\rho_i \approx 35$  days is significantly higher than in Ukraine in the end of March 2021, [72].

Unfortunately the estimations of the pandemic duration in India are very pessimistic (4,434 days or 12.1 years after April 30, 2021). If we suppose that the end of the epidemic corresponds the moment when the number of persons spreading the infection is less than 20, the calculations yield the middle of January 2023. Probably a strict quarantine and vaccination could change this sad trend, but it looks that some new cases of COVID-19 will appear if not always, then for a very long time. The very long duration of the epidemic in India and the large number of cases increase the likelihood of new mutations in the coronavirus, which can make existing vaccines ineffective and pose a threat to all mankind.

| Characteristics                             | $i=2$                |
|---------------------------------------------|----------------------|
| Time period taken for calculations $T_{ci}$ | April 10-23, 2021    |
| $I_i$                                       | 1,388,033.10466357   |
| $R_i$                                       | 11,836,652.8953364   |
| $N_i$                                       | 43,000,000           |
| $v_i$                                       | 7,965,355.17869963   |
| $\alpha_i$                                  | 3.58639081028928e-09 |
| $\rho_i$                                    | 0.0285668766135785   |
| $1/\rho_i$                                  | 35.0055770368917     |
| $r_i$                                       | 0.999959712033103    |
| $S_{i\infty}$                               | 645,561              |
| $V_{i\infty}$                               | 42,354,439           |
| Final day of the epidemic wave              | June 23, 2033        |

**Table 2. The COVID-19 pandemic storm in India. Optimal values of SIR parameters and other characteristics.**

Knowing the optimal values of parameters, the corresponding SIR curves can be easily calculated with the use of exact solution [70, 72, 81] and compared with the pandemic observations before and after  $T_{c2}$ . The results are shown in Figure by blue lines:  $V(t)=I(t)+R(T)$  – solid; dashed one represents the number of infectious persons multiplied by 5, i.e.  $I(t)\times 5$ ; dotted line shows the derivative  $(dV/dt)\times 100$  calculated with the use of formula:

$$\frac{dV}{dt} = \alpha_i SI \quad (4)$$

Equation (4) follows from (2) and (3) and yields an estimation of the real daily number of new cases. Red “Circles” and “stars” correspond to the accumulated numbers of cases registered during the period of time taken for SIR simulations  $T_{i2}$  and beyond this time period, respectively (all taken from Table 1). It can be seen that these values are in good agreement with the theoretical blue solid line.

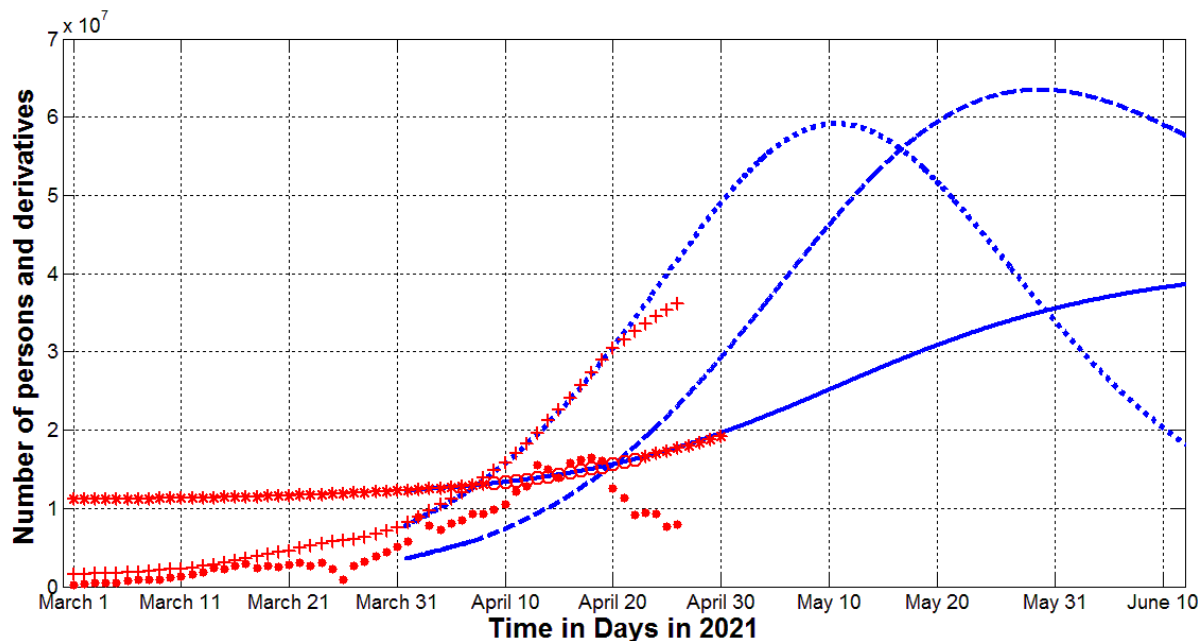

**Figure. The COVID-19 epidemic dynamics in India.**

The results of SIR simulations are shown by blue lines. Numbers of victims  $V(t)=I(t)+R(t)$  – solid; numbers of infected and spreading  $I(t)$  multiplied by 5 – dashed; derivatives  $dV/dt$  (eq. (4)) multiplied by 100 – dotted. Red markers show the real number of cases and its derivatives: “circles” correspond to the accumulated numbers of cases taken for calculations (during period of time  $T_{c2}$ ); “stars” – number of cases beyond  $T_{c2}$  (all the values from Table1); “crosses” – the first derivative (6) multiplied by 100; “dots”- the second derivative (7) multiplied by 1000.

The blue dotted line shows that the daily number of the new cases will start to diminish after May 10, 2021, but the number of people spreading the infection  $I(t)$  will have its maximum only in the end of May, 2021. We can also compare the theoretical curve (4) with the average daily number of new cases which can be calculated with the use of smoothing registered  $V_j$  values [70, 81, 82]:

$$\bar{V}_i = \frac{1}{7} \sum_{j=i-3}^{j=i+3} V_j, \quad (5)$$

and its first derivative:

$$\left. \frac{d \bar{V}}{dt} \right|_{t=t_i} \approx \frac{1}{2} (\bar{V}_{i+1} - \bar{V}_{i-1}) \quad (6)$$

(see, e.g., [70, 81, 82]). The red “crosses” represent the results of calculations of the first derivatives (15) and are in a good agreement with the theoretical dotted line for moments of time before April 22, 2021.

## Discussion

Rather large differences between the real (15) and theoretical (13) values of the first derivative after April 22, 2021 can be explained by two factors. The first is related to changes in the dynamics of the epidemic. This is evidenced by the sharp changes in the second derivative of the average number of reported cases, which can be estimated using formulas:

$$\left. \frac{d^2 \bar{V}}{dt^2} \right|_{t=t_i} \approx \bar{V}_{i+1} - 2\bar{V}_i + \bar{V}_{i-1} \quad (7)$$

and (5) (see, e.g., [70, 81, 82]).

So we can talk about a new wave of pandemic in India, which may be weaker than the one we see in April 2021 due to the sharp decrease in the second derivative (7) after April 20, 2021 (see red dots in the figure). The course of the epidemic and new simulations will help to clarify these findings.

The second reason for discrepancies between formulae (4) and (6) may be the large number of unregistered cases observed in other countries [72, 78-80]. Estimates for Ukraine made in [72] showed that the real number of cases is about four times higher than registered and reflected in official statistics. Similar estimates can be made for the case of India. But the results already obtained show that the COVID-19 pandemic will be a problem for mankind for a very long time.

## Acknowledgements

The author is grateful to Dr. Vinod Varghese and Oleksii Rodionov for their help in collecting and processing data.

## References

1. Wu JT, Leung K, Leung GM. Nowcasting and Forecasting the Potential Domestic and International Spread of the 2019-nCoV Outbreak Originating in Wuhan, China: A Modelling Study. *Lancet* 2020 Jan 31. DOI: 10.1016/S0140-6736(20)30260-9
2. Shi Zhao et al. Preliminary estimation of the basic reproduction number of novel coronavirus (2019-nCoV) in China, from 2019 to 2020: A data-driven analysis in the early phase of the outbreak. *International Journal of Infectious Diseases*. January 30, 2020. DOI: <https://doi.org/10.1016/j.ijid.2020.01.050>
3. Byass P. Eco-epidemiological assessment of the COVID-19 epidemic in China, January-February 2020. *medRxiv [Preprint.]* 2020. doi:10.1101/2020.03.29.20046565.
4. Tang B, Bragazzi NL, Li Q. et al. An updated estimation of the risk of transmission of the novel coronavirus (2019-nCoV). *Infectious disease modeling*. 2020;5:248–255. DOI:10.1016/j.idm.2020.02.001.

5. Ying Liu, Gayle AA, Wilder-Smith A, Rocklöv J. The reproductive number of COVID-19 is higher compared to SARS coronavirus. *Jurnal of Travel Medicine*. 2020;27(2): taaa021. DOI: <https://doi.org/10.1093/jtm/taaa021>
6. Kucharski AJ. et al. Early dynamics of transmission and control of COVID-19: a mathematical modelling study. *The Lancet Infectious Diseases*. 2020. DOI:[https://doi.org/10.1016/S1473-3099\(20\)30144-4](https://doi.org/10.1016/S1473-3099(20)30144-4)
7. Batista M. Estimation of the final size of the COVID-19 epidemic. *medRxiv [Preprint]* 2020. doi:10.1101/2020.02.16.20023606.
8. Dehning J. et al. Inferring COVID-19 spreading rates and potential change points for case number forecasts. *arXiv [Preprint]* 2020. arXiv:2004.01105
9. Chen Y, Cheng J, Jiang Y, Liu K. A time delay dynamical model for outbreak of 2019-nCoV and the parameter identification. *arXiv [Preprint]* 2020. arXiv:2002.00418
10. Peng L, Yang W, Zhang D, Zhuge C, Hong L. Epidemic analysis of COVID-19 in China by dynamical modeling. *arXiv [Preprint]* 2020. arXiv :2002.06563
11. Chang SL, Harding N, Zachreson C, Cliff OM, Prokopenko M. Modelling transmission and control of the COVID-19 pandemic in Australia. *arXiv [Preprint]* 2020. arXiv:2003.10218
12. Maier BF, Brockmann D. Effective containment explains sub-exponential growth in confirmed cases of recent COVID-19 out break in mainland China. *arXiv [Preprint]* 2020. arXiv:2002.07572.
13. Song PX, Wang L, Zhou Y, He J, Zhu B, Wang F, et al. An epidemiological forecast model and software assessing interventions on COVID-19 epidemic in China. *medRxiv [Preprint]* 2020. DOI: <https://doi.org/10.1101/2020.02.29.20029421>
14. Chinazzi M, Davis JT, Ajelli M, Gioannini C, Litvinova M, Merler S, et al. The effect of travel restrictions on the spread of the 2019 novel coronavirus (COVID-19) outbreak. *Science* 2020 368(6489): 395–400. <https://doi.org/10.1126/science.aba9757> PMID:32144116
15. Zhang Y, Jiang B, Yuan J, Tao Y. The impact of social distancing and epicenter lockdown on the COVID-19 epidemic in mainland China: A data-driven SEIQR model study. *medRxiv [Preprint]* 2020. DOI: <https://doi.org/10.1101/2020.03.04.20031187>
16. Ghanam R, Boone EL, Abdel-Salam ASG. SEIRD MODEL FOR QATAR COVID-19 OUTBREAK: A CASE STUDY. *arXiv [Preprint]* 2020. arXiv:2005.12777v1
17. Pongkaew Udomsamuthirun et al. The reproductive index from SEIR model of Covid-19 epidemic in Asean. *medRxiv [Preprint]* 2020. DOI: <https://doi.org/10.1101/2020.04.24.20078287>
18. Pereira IG et al. Forecasting Covid-19 Dynamics in Brazil: A Data Driven Approach. *Int. J. Environ. Res. Public Health*. 2020;17(14):5115; <https://doi.org/10.3390/ijerph17145115>
19. Linka K, Peirlinck M, Kuhl E. The reproduction number of COVID-19 and its correlation with public health interventions. *medRxiv [Preprint]* 2020. DOI:10.1101/2020.05.01.20088047
20. Distante C, Gadelha Pereira I, Garcia Goncalves LM, Piscitelli P, Miani A. Forecasting Covid-19 Outbreak Progression in Italian Regions: A model based on neural network training from Chinese data. *medRxiv [Preprint]* 2020. doi: <https://doi.org/10.1101/2020.04.09.20059055>



21. Hamzah F, Binti A, Lau C, Nazri H, Ligot DV, Lee G, Tan CL. CoronaTracker: Worldwide COVID-19 Outbreak Data Analysis and Prediction. *Bull. World Health Organ.* 2020, 1, 32.
22. Fanelli D, Piazza F. Analysis and forecast of COVID-19 spreading in China, Italy and France. *Chaos Solitons Fractals.* 2020;134:109761.
23. Webb GF, Magal P, Liu Z, Seydi O. A model to predict COVID-19 epidemics with applications to South Korea, Italy, and Spain. *medRxiv [Preprint]* 2020. DOI: <https://doi.org/10.1101/2020.04.07.2005694>
24. Bastos SB, Cajueiro DO. Modeling and forecasting the early evolution of the Covid-19 pandemic in Brazil. *arXiv [Preprint]* 2020, arXiv:2003.14288.
25. Grant A. Dynamics of COVID-19 epidemics: SEIR models underestimate peak infection rates and overestimate epidemic duration. *medRxiv [Preprint]* 2020. DOI: <https://doi.org/10.1101/2020.04.02.20050674>
26. Loli Piccolomiini E, Zama F. Monitoring Italian COVID-19 spread by an adaptive SEIRD model. *medRxiv [Preprint]* 2020. DOI: <https://doi.org/10.1101/2020.04.03.20049734>
27. Baerwolff G. A Contribution to the Mathematical Modeling of the Corona/COVID-19 Pandemic. *medRxiv [Preprint]* 2020. DOI: <https://doi.org/10.1101/2020.04.01.20050229>
28. Distante C, Piscitelli P, Miani A. Covid-19 Outbreak Progression in Italian Regions: Approaching the Peak by the End of March in Northern Italy and First Week of April in Southern Italy. *Int. J. Environ. Res. Public Health* 2020, 17, 3025.
29. te Vrugt M, Bickmann J, Wittkowski R. Effects of social distancing and isolation on epidemic spreading: A dynamical density functional theory model. *arXiv [Preprint]* 2020. arXiv:2003.13967.
30. Yang, Z et al. Modified SEIR and AI prediction of the epidemics trend of COVID-19 in China under public health interventions. *J. Thorac. Dis.* 2020;12:165.
31. Roda WC, Varughese MB, Han D, Li MY. Why is it difficult to accurately predict the COVID-19 epidemic? *Infect. Dis. Model.* 2020;5:271–281.
32. Otunuga OM, Ogunsolu MO. Qualitative analysis of a stochastic SEITR epidemic model with multiple stages of infection and treatment. *Infect. Dis. Model.* 2020;5:61–90.
33. Chatterjee K et al. Healthcare impact of COVID-19 epidemic in India: A stochastic mathematical model. *Medical Journal Armed Forces India.* 2020;76(2):147-155.
34. Ciufolini I, Paolozzi A. Mathematical prediction of the time evolution of the COVID-19 pandemic in Italy by a Gauss error function and Monte Carlo simulations. *Eur. Phys. J. Plus.* 2020;135: 355 <https://doi.org/10.1140/epjp/s13360-020-00383-y>
35. Annas S et al. Stability analysis and numerical simulation of SEIR model for pandemic COVID-19 spread in Indonesia. *Chaos, Solitons & Fractals.* 2020;139:110072 <https://doi.org/10.1016/j.chaos.2020.110072>
36. RP Yadav, R Verma A numerical simulation of fractional order mathematical modeling of COVID-19 disease in case of Wuhan China. *Chaos, Solitons & Fractals.* 2020;140:110124. <https://doi.org/10.1016/j.chaos.2020.110124>

37. Ng KY, Gui MM. COVID-19: Development of a robust mathematical model and simulation package with consideration for ageing population and time delay for control action and resusceptibility. *Physica D: Nonlinear Phenomena*. 2020;411: 132599.  
<https://doi.org/10.1016/j.physd.2020.132599>
38. Ivorra B, Ferrández MR, Vela-Pérez M, Ramos AM. Mathematical modeling of the spread of the coronavirus disease 2019 (COVID-19) taking into account the undetected infections. The case of China. *Communications in Nonlinear Science and Numerical Simulation*. 2020; 88:105303.  
<https://doi.org/10.1016/j.cnsns.2020.105303>
39. Tuan NH, Mohammadi H, Rezapour S. A mathematical model for COVID-19 transmission by using the Caputo fractional derivative. *Chaos, Solitons & Fractals*. 2020; 110107.  
<https://doi.org/10.1016/j.chaos.2020.110107>
40. Sinkala M et. al. The COVID-19 Pandemic in Africa: Predictions using the SIR Model. *medRxiv [Preprint]* 2020. DOI: <https://doi.org/10.1101/2020.06.01.2011889>
41. Agbokou K, Gneyou K, Tcharie K. Investigation on the temporal evolution of the covid'19pandemic: prediction for Togo. *Open Jornal of mathematical sciences*. 2020;4:273-279. DOI:10.30538/oms2020.0118<https://pisrt.org/psr-press/journals/oms>
42. Pintér G, Felde I, Mosavi A, Gloaguen R. COVID-19 Pandemic Prediction for Hungary; A Hybrid Machine Learning Approach. *Mathematics*. 2020;8:890. DOI:10.3390/math8060890[www.mdpi.com/journal/mathematics](http://www.mdpi.com/journal/mathematics)
43. Rossman H et al. Patterns of COVID-19 pandemic dynamics following deployment of a broad national immunization program. *medRxiv [Preprint]* 2021. DOI: <https://doi.org/10.1101/2021.02.08.21251325>
44. Furati KM, Sarumi IO, Khaliq AQM. Memory-Dependent Model for the Dynamics of COVID-19 Pandemic. *medRxiv [Preprint]* 2020. DOI: <https://doi.org/10.1101/2020.06.26.20141242>
45. Bosch J, Wilson A, O'Neil K, Zimmerman PA. COVID-19 Predict - Predicting Pandemic Trends. *medRxiv [Preprint]* 2020. DOI: <https://doi.org/10.1101/2020.09.09.20191593>
46. Asad A, Srivastava S, Verma MK. Evolution of COVID-19 Pandemic in India. *medRxiv [Preprint]* 2020. DOI: <https://doi.org/10.1101/2020.07.01.20143925>
47. Nawel Aries, Houdayfa Ounis. Mathematical Modeling of COVID-19 Pandemic in the African Continent. *medRxiv [Preprint]* 2020. DOI: <https://doi.org/10.1101/2020.10.10.20210427>
48. Guenther F, Bender A, Katz K, Kuechenhoff H, Hoehle M. Nowcasting the COVID-19 Pandemic in Bavaria. *medRxiv [Preprint]* 2020. DOI: <https://doi.org/10.1101/2020.06.26.20140210>
49. Yang W, Shaff J, Shaman J. COVID-19 Transmission Dynamics and Effectiveness of Public Health Interventions in New York City during the 2020 Spring Pandemic Wave. *medRxiv [Preprint]* 2020. DOI: <https://doi.org/10.1101/2020.09.08.20190710>
50. Dickman R. A SEIR-like model with a time-dependent contagion factor describes the dynamics of the Covid-19 pandemic. *medRxiv [Preprint]* 2020. DOI: <https://doi.org/10.1101/2020.08.06.20169557>
51. Kundu LR, Ferdous MZ, Islam US, Sultana M. Forecasting the spread of COVID-19 pandemic in Bangladesh using ARIMA model. *medRxiv [Preprint]* 2020. DOI: <https://doi.org/10.1101/2020.10.22.20217414>

52. Carvalho D, Barbastefano R, Pastore D, Lippi MC. A novel predictive mathematical model for COVID-19 pandemic with quarantine, contagion dynamics, and environmentally mediated transmission. medRxiv [Preprint] 2020. DOI: <https://doi.org/10.1101/2020.07.27.20163063>
53. Biswas MHA et al. Modeling the Effective Control Strategy for Transmission Dynamics of Global Pandemic COVID-19. medRxiv [Preprint] 2020. DOI: <https://doi.org/10.1101/2020.04.22.20076158>
54. Aviv-Sharon E, Aharoni A. Forecasting COVID-19 pandemic Severity in Asia. medRxiv [Preprint] 2020. DOI: <https://doi.org/10.1101/2020.05.15.20102640>
55. Bannur N et al. Adaptive COVID-19 Forecasting via Bayesian Optimization. medRxiv [Preprint] 2020. DOI: <https://doi.org/10.1101/2020.10.19.2021529>
56. Honfo SH, Taboe BH, Kakai RG. Modeling COVID-19 dynamics in the sixteen West African countries. medRxiv [Preprint] 2020. DOI: <https://doi.org/10.1101/2020.09.04.20188532>
57. Chruściel PT, Szybka SJ. Universal properties of the dynamics of the Covid-19 pandemics. medRxiv [Preprint] 2020. DOI: <https://doi.org/10.1101/2020.08.24.20181214>
58. Reddy BRM, Singh A, Srivastava P. COVID-19 TRANSMISSION DYNAMICS IN INDIA WITH EXTENDED SEIR MODEL. medRxiv [Preprint] 2020. DOI: <https://doi.org/10.1101/2020.08.15.20175703>
59. Huang J et al. The amplified second outbreaks of global COVID-19 pandemic. medRxiv [Preprint] 2020. DOI: <https://doi.org/10.1101/2020.07.15.2015416>
60. Bhanot G, DeLisi C. Analysis of Covid-19 Data for Eight European Countries and the United Kingdom Using a Simplified SIR Model. medRxiv [Preprint] 2020. DOI: <https://doi.org/10.1101/2020.05.26.20114058>
61. Ibrahim MA, Al-Najafi A. Modeling, Control, and Prediction of the Spread of COVID-19 Using Compartmental, Logistic, and Gauss Models: A Case Study in Iraq and Egypt . Processes 2020,8, 1400; DOI:10.3390/pr8111400
62. Perone G. Comparison of ARIMA, ETS, NNAR and hybrid models to forecast the second wave of COVID-19 hospitalizations in Italy (HEDG-WP 20/18, University of York). [Preprint] 2020. <http://www.york.ac.uk/economics/postgrad/herc/hedg/wps/>
63. Bueno AM, Batistela CM, Correa DPF, Piqueira JRC. SIRS<sub>i</sub> compartmental model for COVID-19 pandemic with immunity loss. Chaos Solitons & Fractals, Oct 2020. DOI: 10.1016/j.chaos.2020.110388
64. Fahmya AE, El-desoukya MM, Mohamed ASA. Epidemic Analysis of COVID-19 in Egypt, Qatar and Saudi Arabia using the Generalized SEIR Model. medRxiv [Preprint] 2020. DOI: <https://doi.org/10.1101/2020.08.19.20178129>
65. Nesteruk I. Statistics-based predictions of coronavirus epidemic spreading in mainland China. Innov Biosyst Bioeng. 2020; 4(1):13–18. DOI: 10.20535/ibb.2020.4.1.195074.
66. Nesteruk I. Coronavirus epidemic outbreak in Europe. Comparison with the dynamics in mainland China. KPI Science News. No. 1 (2020), pp. 15-17. <https://doi.org/10.20535/kpi-sn.2020.1.198043>

67. Nesteruk I. Simulations and predictions of COVID-19 pandemic with the use of SIR model. *Innov Biosyst Bioeng*, 2020, vol. 4, no. 2, 110–121, doi: 10.20535/ibb.2020.4.2.204274. <http://ibb.kpi.ua/article/view/204274>
68. Nesteruk, I., Kydybyn, I., Demelmair, G. GLOBAL STABILIZATION TRENDS OF COVID-19 PANDEMIC. *KPI Science News*, 2020, No. 2, pp. 55-62. DOI: 10.20535/kpi-sn.2020.2.205124
69. Nesteruk I. Dynamics of the coronavirus pandemic in Italy and some global predictions. *J Allergy Infect Dis* 2020; 1(1):5-8. <https://probiologists.com/Article/Dynamics-of-the-coronavirus-pandemic-in-Italy-and-some-global-predictions>
70. Nesteruk I. *COVID19 pandemic dynamics*. Springer Nature, 2021, DOI: 10.1007/978-981-33-6416-5
71. Nesteruk I., Benlagha N. PREDICTIONS OF COVID-19 PANDEMIC DYNAMICS IN UKRAINE AND QATAR BASED ON GENERALIZED SIR MODEL. *Innov Biosyst Bioeng*, 2021, vol. 5, no. 1, pp. 37–46. <https://doi.org/10.20535/ibb.2021.5.1.228605>
72. Nesteruk I. Visible and real sizes of new COVID-19 pandemic waves in Ukraine *Innov Biosyst Bioeng*, 2021, vol. 5, no. 2, pp. 85–96. DOI: 10.20535/ibb.2021.5.2.230487 <http://ibb.kpi.ua/article/view/230487>
73. Li, Q., Guan, X., Wu, P., et al. Early transmission dynamics in Wuhan, China, of novel coronavirus–infected pneumonia. *The New England journal of medicine*, 2020 Jan. 29. DOI:10.1056/NEJMoa2001316.
74. <https://www.scmp.com/news/china/society/article/3076334/coronavirus-strange-pneumonia-seen-lombardy-november-leading>
75. F.-X. Lescure et al. Clinical and virological data of the first cases of COVID-19 in Europe: a case series. [www.thelancet.com/infection](http://www.thelancet.com/infection) Published online March 27, 2020 [https://doi.org/10.1016/S1473-3099\(20\)30200-0](https://doi.org/10.1016/S1473-3099(20)30200-0)
76. Frankfurter Allgemeine. <https://m.faz.net/aktuell/sport/mehr-sport/militaerweltspiele-2019-in-wuhan-damals-schon-corona-faelle-16758894.html>
77. Weinberger DM et al. Estimating the early death toll of COVID-19 in the United States. [Preprint.] *MEDRXIV*, 2020 Apr. <https://doi.org/10.1101/2020.04.15.2006643>
78. <https://podillyanews.com/2020/12/17/u-shkolah-hmelnyskogo-provely-eksperyment-z-testuvannyam-na-covid-19/>
79. <https://edition.cnn.com/2020/11/02/europe/slovakia-mass-coronavirus-test-intl/index.html>
80. <https://www.voanews.com/covid-19-pandemic/slovakias-second-round-coronavirus-tests-draws-large-crowds>
81. Nesteruk I. Waves of COVID-19 pandemic. Detection and SIR simulations. *MedRxiv*. 2020 Aug. doi: <https://doi.org/10.1101/2020.08.03.20167098> <https://www.medrxiv.org/content/10.1101/2020.08.03.20167098v1>
82. Nesteruk I. COVID-19 pandemic dynamics in Ukraine after September 1, 2020. *MedRxiv*. Posted December 22, 2020. Doi: <https://doi.org/10.1101/2020.12.21.20248627>

83. Nesteruk I. Procedures of Parameter Identification for the Waves of Epidemics. In book: COVID-19 Pandemic Dynamics, Springer Nature, 2021. DOI: 10.1007/978-981-33-6416-5\_10.
84. COVID-19 Data Repository by the Center for Systems Science and Engineering (CSSE) at Johns Hopkins University (JHU). <https://github.com/owid/covid-19-data/tree/master/public/data>
85. Kermack WO, McKendrick AG. A Contribution to the mathematical theory of epidemics. J Royal Stat Soc Ser A. 1927;115:700-21.
86. Murray JD. Mathematical Biology I/II. New York: Springer; 2002.
87. Langemann D, Nesteruk I, Prestin J. Comparison of mathematical models for the dynamics of the Chernivtsi children disease. Mathematics in Computers and Simulation. 2016;123:68-79. DOI: 10.1016/j.matcom.2016.01.003
88. Draper NR, Smith H. Applied regression analysis. 3rd ed. John Wiley; 1998.
89. Gazzola M., Argentina M. & L. Mahadevan. Scaling macroscopic aquatic locomotion. Nature Physics, Volume 10, pages 758–761 (2014).
90. Nesteruk I. Statistics based models for the dynamics of Chernivtsi children disease. Naukovi Visti NTUU KPI. 2017;5:26-34. DOI: 10.20535/1810-0546.2017.5.108577
91. Nesteruk I. Maximal speed of underwater locomotion. Innov Biosyst Bioeng, 2019, vol. 3, no. 3, pp. 152–167. Doi: <https://doi.org/10.20535/ibb.2019.3.3.177976>
92. Nesteruk I. Procedures of Parameter Identification for the Waves of Epidemics. In book: COVID-19 Pandemic Dynamics, Springer Nature, 2021. DOI: 10.1007/978-981-33-6416-5\_10.
